# Supplementary material
Source: PubMed Central journal article supplement (PMC4647594)
Supplement: mmc1.pdf [file mmc1.pdf]

# THE LANCET

## Supplementary appendix

This appendix formed part of the original submission and has been peer reviewed. We post it as supplied by the authors.

Supplement to: Emberson J, Lees KR, Lyden P, et al. Effect of treatment delay, age, and stroke severity on the effects of intravenous thrombolysis with alteplase for acute ischaemic stroke: a meta-analysis of individual patient data from randomised trials. *Lancet* 2014; published online Aug 6. [http://dx.doi.org/10.1016/S0140-6736\(14\)60584-5](http://dx.doi.org/10.1016/S0140-6736(14)60584-5).

# **Webmaterial: Effect of treatment delay, age and stroke severity on the effects of intravenous thrombolysis with alteplase for acute ischaemic stroke: a meta-analysis of individual patient data from randomised trials**

| <b>Webtables</b>                                                                                                  | <b>Pg</b> |
|-------------------------------------------------------------------------------------------------------------------|-----------|
| 1. Baseline characteristics of IST-3 and 8 previous trials, overall and separately according to time to treatment | 1         |
| 2. Baseline characteristics by randomised treatment allocation                                                    | 2         |
| 3. Number of outcomes by participating trial                                                                      | 3         |

  

| <b>Webfigures</b>                                                                                             |   |
|---------------------------------------------------------------------------------------------------------------|---|
| 1. Pairwise relationships between baseline age, stroke severity and time to treatment in two groups of trials | 4 |
| 2. Effect of alteplase on a good stroke outcome (mRS 0–1) by treatment delay, age and stroke severity         | 5 |

**Webtable 1: Baseline characteristics of IST-3 and 8 previous trials, overall and separately according to time to treatment**

| Baseline variable               | ≤3 hours          |             |         | >3, ≤4.5 hours    |             |         | >4.5 hours        |             |         | Total             |             |         |
|---------------------------------|-------------------|-------------|---------|-------------------|-------------|---------|-------------------|-------------|---------|-------------------|-------------|---------|
|                                 | 8 previous trials | IST-3       | p value | 8 previous trials | IST-3       | p value | 8 previous trials | IST-3       | p value | 8 previous trials | IST-3       | p value |
| Number randomised               | 929               | 620         |         | 1620              | 1148        |         | 1128              | 1266        |         | 3721              | 3035        |         |
| Treatment delay (hours)         | 2.2 (0.6)         | 2.4 (0.4)   | <0.0001 | 3.9 (0.4)         | 3.8 (0.4)   | <0.0001 | 5.2 (0.6)         | 5.4 (0.5)   | <0.0001 | 3.9 (1.2)         | 4.2 (1.2)   | <0.0001 |
| Age (years)                     | 67 (11)           | 83 (8)      | <0.0001 | 65 (12)           | 79 (11)     | <0.0001 | 66 (12)           | 73 (13)     | <0.0001 | 66 (12)           | 77 (12)     | <0.0001 |
| ≤80                             | 869 (94%)         | 114 (18%)   | <0.0001 | 1589 (98%)        | 474 (41%)   | <0.0001 | 1106 (98%)        | 830 (66%)   | <0.0001 | 3606 (97%)        | 1418 (47%)  | <0.0001 |
| >80                             | 60 (6%)           | 506 (82%)   |         | 31 (2%)           | 674 (59%)   |         | 21 (2%)           | 436 (34%)   |         | 112 (3%)          | 1617 (53%)  |         |
| Stroke severity (NIHSS)         | 14 (7)            | 14 (7)      | 0.789   | 11 (6)            | 13 (7)      | <0.0001 | 11 (6)            | 11 (7)      | 0.216   | 12 (6)            | 12 (7)      | 0.216   |
| 0-4                             | 50 (5%)           | 54 (9%)     | 0.097   | 129 (8%)          | 139 (12%)   | <0.0001 | 82 (7%)           | 207 (16%)   | <0.0001 | 266 (7%)          | 400 (13%)   | <0.0001 |
| 5-10                            | 284 (31%)         | 187 (30%)   |         | 687 (42%)         | 370 (32%)   |         | 483 (43%)         | 507 (40%)   |         | 1469 (39%)        | 1064 (35%)  |         |
| 11-15                           | 211 (23%)         | 124 (20%)   |         | 394 (24%)         | 237 (21%)   |         | 281 (25%)         | 240 (19%)   |         | 887 (24%)         | 601 (20%)   |         |
| 16-21                           | 219 (24%)         | 156 (25%)   |         | 300 (19%)         | 244 (21%)   |         | 190 (17%)         | 217 (17%)   |         | 715 (19%)         | 618 (20%)   |         |
| ≥22                             | 135 (15%)         | 99 (16%)    |         | 72 (4%)           | 158 (14%)   |         | 52 (5%)           | 95 (8%)     |         | 270 (7%)          | 352 (12%)   |         |
| Female                          | 373 (40%)         | 368 (59%)   | <0.0001 | 637 (39%)         | 609 (53%)   | <0.0001 | 462 (41%)         | 592 (47%)   | 0.004   | 1487 (40%)        | 1570 (52%)  | <0.0001 |
| History of hypertension         | 559 (60%)         | 430 (69%)   | 0.0002  | 912 (56%)         | 723 (63%)   | 0.0003  | 622 (55%)         | 800 (63%)   | <0.0001 | 2114 (57%)        | 1954 (64%)  | <0.0001 |
| History of stroke               | 123 (13%)         | 142 (23%)   | <0.0001 | 222 (14%)         | 291 (25%)   | <0.0001 | 195 (17%)         | 266 (21%)   | 0.024   | 544 (15%)         | 699 (23%)   | <0.0001 |
| History of diabetes mellitus    | 186 (20%)         | 49 (8%)     | <0.0001 | 275 (17%)         | 133 (12%)   | <0.0001 | 217 (19%)         | 206 (16%)   | 0.061   | 690 (19%)         | 388 (13%)   | <0.0001 |
| History of atrial fibrillation  | 189 (20%)         | 237 (38%)   | <0.0001 | 279 (17%)         | 360 (31%)   | <0.0001 | 224 (20%)         | 316 (25%)   | 0.003   | 700 (19%)         | 914 (30%)   | <0.0001 |
| Aspirin use                     | 262 (28%)         | 320 (52%)   | <0.0001 | 411 (25%)         | 460 (40%)   | <0.0001 | 276 (24%)         | 526 (42%)   | <0.0001 | 955 (26%)         | 1306 (43%)  | <0.0001 |
| Weight (kg)                     | 77.6 (16.5)       | 68.2 (13.5) | <0.0001 | 77.2 (15.1)       | 71.0 (14.5) | <0.0001 | 75.9 (16.5)       | 74.8 (15.3) | 0.080   | 76.9 (15.9)       | 72.0 (14.9) | <0.0001 |
| Systolic blood pressure (mmHg)  | 154 (22)          | 157 (24)    | 0.022   | 152 (20)          | 155 (24)    | 0.001   | 153 (21)          | 155 (24)    | 0.046   | 153 (21)          | 155 (24)    | <0.0001 |
| Diastolic blood pressure (mmHg) | 85 (14)           | 81 (15)     | <0.0001 | 84 (13)           | 82 (14)     | 0.0001  | 84 (13)           | 83 (15)     | 0.039   | 84 (13)           | 82 (15)     | <0.0001 |

Categorical data presented as n (%), continuous data presented as mean (SD). The p-values can be used to identify the statistically, but not necessarily clinically, significant differences between patients in IST-3 and patients in the 8 earlier trials.

**Webtable 2: Baseline characteristics by randomised treatment allocation**

| Baseline variable               | Randomised treatment allocation |             |
|---------------------------------|---------------------------------|-------------|
|                                 | Alteplase                       | Control     |
| Number randomised               | 3391                            | 3365        |
| Treatment delay (hours)         | 4.0 (1.2)                       | 4.0 (1.2)   |
| ≤3                              | 787 (23%)                       | 762 (23%)   |
| >3, ≤4.5                        | 1354 (40%)                      | 1414 (42%)  |
| >4.5                            | 1229 (36%)                      | 1165 (35%)  |
| Age (years)                     | 71 (13)                         | 71 (13)     |
| ≤80                             | 2510 (74%)                      | 2514 (75%)  |
| >80                             | 879 (26%)                       | 850 (25%)   |
| Stroke severity (NIHSS)         | 12 (7)                          | 12 (6)      |
| 0-4                             | 345 (10%)                       | 321 (10%)   |
| 5-10                            | 1281 (38%)                      | 1252 (37%)  |
| 11-15                           | 747 (22%)                       | 741 (22%)   |
| 16-21                           | 662 (20%)                       | 671 (20%)   |
| ≥22                             | 309 (9%)                        | 313 (9%)    |
| Female                          | 1532 (45%)                      | 1525 (45%)  |
| History of hypertension         | 2041 (60%)                      | 2027 (60%)  |
| History of stroke               | 619 (18%)                       | 624 (19%)   |
| History of diabetes mellitus    | 531 (16%)                       | 547 (16%)   |
| History of atrial fibrillation  | 827 (24%)                       | 787 (23%)   |
| Aspirin use                     | 1125 (33%)                      | 1136 (34%)  |
| Weight (kg)                     | 74.4 (15.3)                     | 75.0 (15.9) |
| Systolic blood pressure (mmHg)  | 154 (22)                        | 154 (23)    |
| Diastolic blood pressure (mmHg) | 83 (14)                         | 83 (14)     |

Note. No imputation of missing values.

Categorical data presented as n (%), continuous data presented as mean (SD).

**Webtable 3: Number of outcomes by participating trial**

| STT trial    | Number randomized | mRS 0-1 at 3-6 months | Death within 90 days | Symptomatic intracranial haemorrhage |               |                     | mRS 3-6 months |             |            |            |            |             |
|--------------|-------------------|-----------------------|----------------------|--------------------------------------|---------------|---------------------|----------------|-------------|------------|------------|------------|-------------|
|              |                   |                       |                      | SITS-MOST at 24-36 hours             | PH2 at 7 days | Fatal ICH at 7 days | 0              | 1           | 2          | 3          | 4          | 5/6*        |
| NINDS A      | 291               | 109                   | 55                   | 4                                    | 5             | 3                   | 48             | 61          | 25         | 42         | 45         | 70          |
| NINDS B      | 333               | 108                   | 63                   | 5                                    | 7             | 3                   | 44             | 64          | 35         | 43         | 60         | 87          |
| ECASS I      | 620               | 197                   | 117                  | 14                                   | 28            | 9                   | 85             | 112         | 62         | 82         | 109        | 170         |
| ECASS II     | 800               | 308                   | 84                   | 26                                   | 36            | 16                  | 159            | 149         | 94         | 133        | 143        | 122         |
| ATLANTIS A   | 142               | 22                    | 21                   | 3                                    | 6             | 3                   | 9              | 13          | 4          | 3          | 7          | 106         |
| ATLANTIS B   | 613               | 252                   | 55                   | 9                                    | 15            | 4                   | 106            | 146         | 88         | 77         | 105        | 91          |
| ECASS III    | 821               | 401                   | 60                   | 9                                    | 15            | 2                   | 203            | 198         | 125        | 85         | 94         | 116         |
| EPITHET      | 101               | 30                    | 20                   | 4                                    | 4             | 2                   | 9              | 21          | 13         | 13         | 17         | 28          |
| IST-3        | 3035              | 683                   | 689                  | 69                                   | 159           | 62                  | 254            | 429         | 405        | 428        | 255        | 1264        |
| <b>Total</b> | <b>6756</b>       | <b>2110</b>           | <b>1164</b>          | <b>143</b>                           | <b>275</b>    | <b>104</b>          | <b>917</b>     | <b>1193</b> | <b>851</b> | <b>906</b> | <b>835</b> | <b>2054</b> |

\* mRS group 6 is not directly comparable between IST-3 and the 8 previous trials because it is based on vital status at 6 rather than 3 months (see Methods). However mRS groups 5 and 6 grouped together are likely to be broadly comparable across all the trials.

**Webfigure 1: Pairwise relationships between baseline age, stroke severity and time to treatment in two groups of trials**

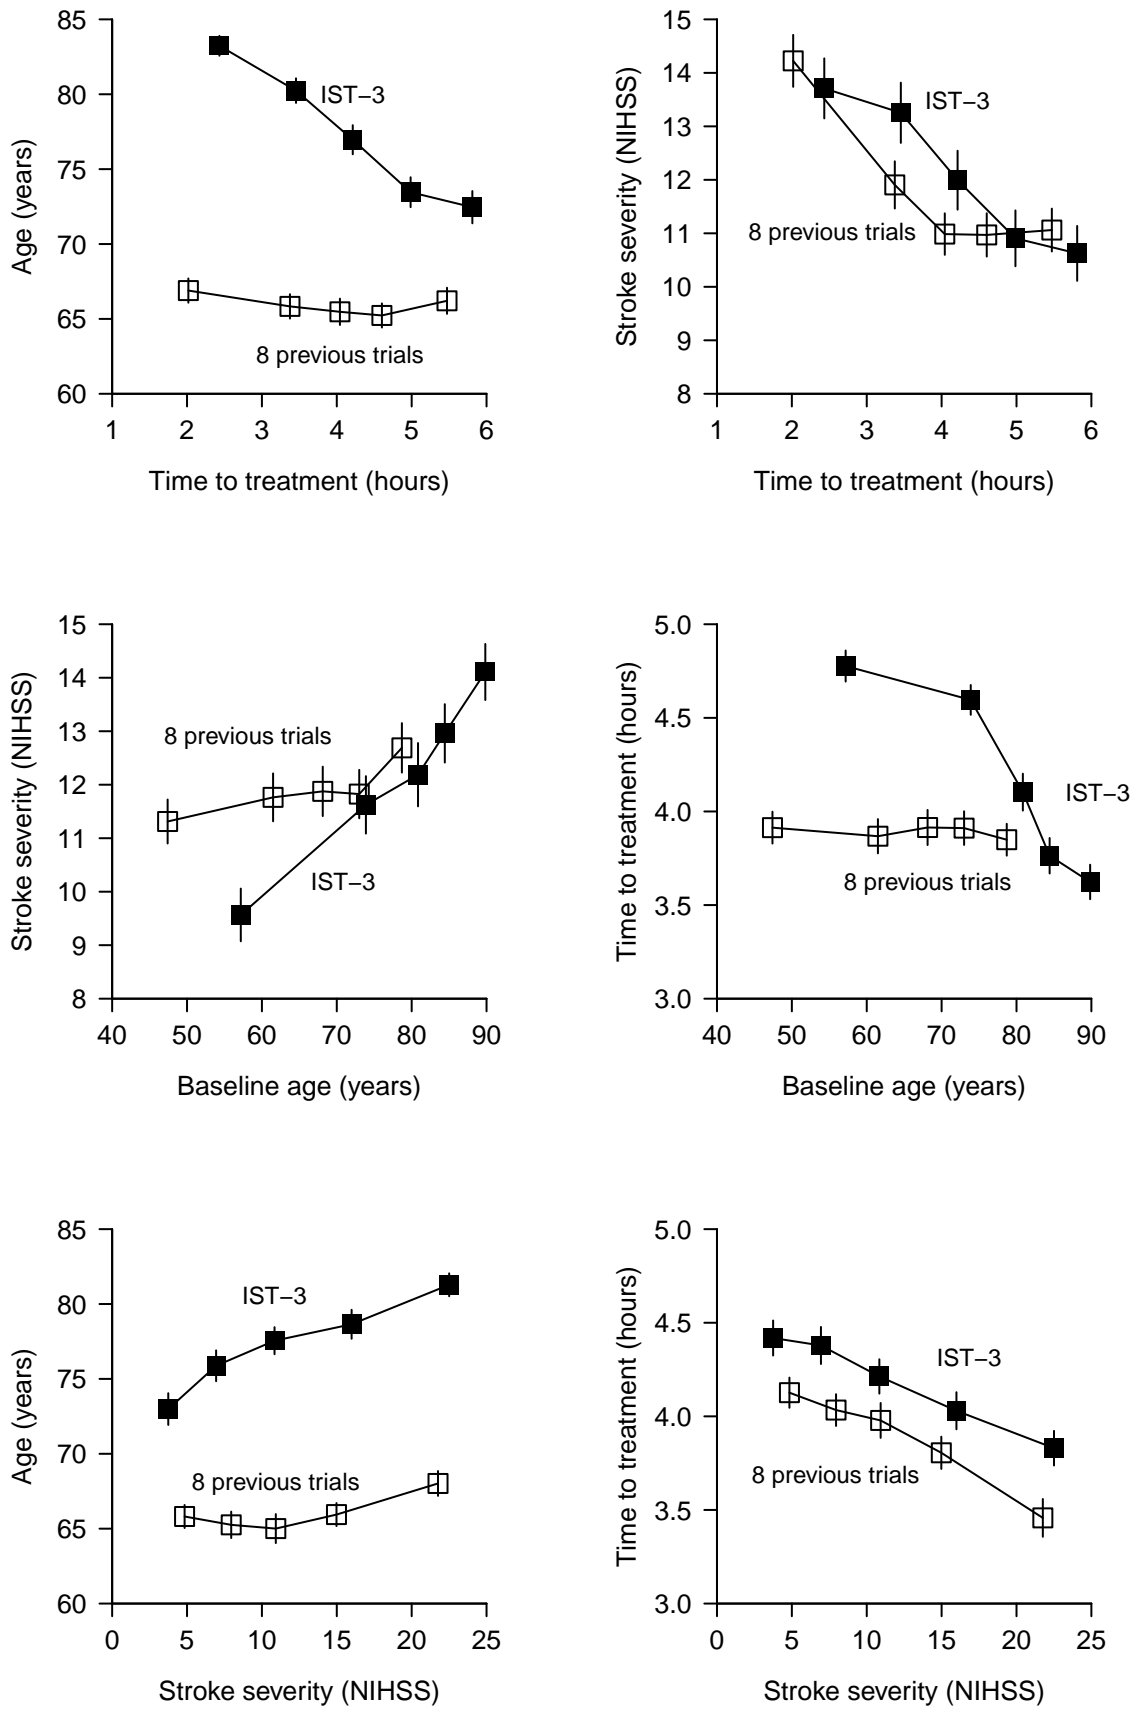

Means and 95% confidence intervals shown. Plotted y values are shown against the mean x value within each fifth of the respective distribution.

**Webfigure 2: Effect of alteplase on a good stroke outcome (mRS 0–1) by treatment delay, age and stroke severity**

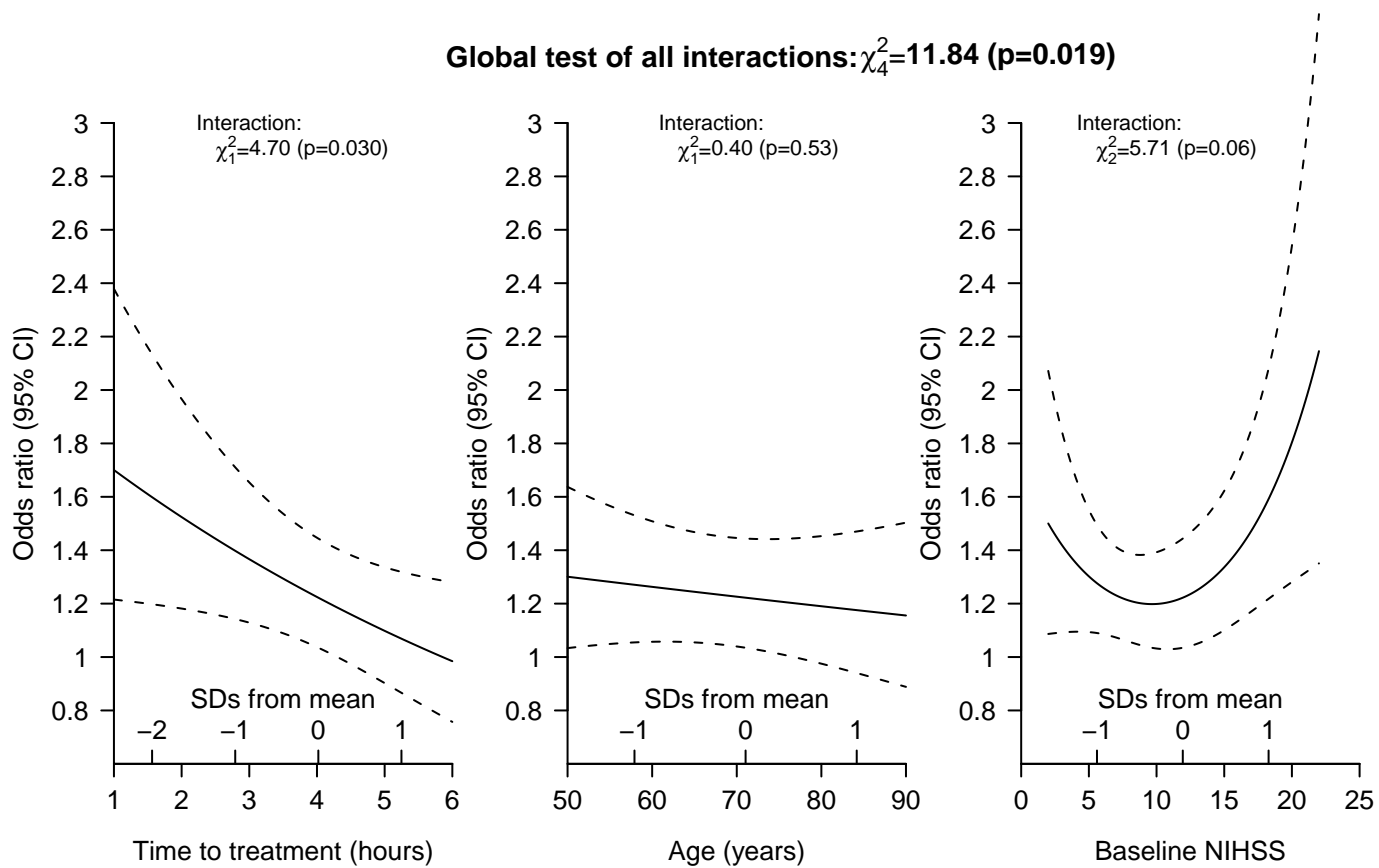

The solid line on each plot represents the interaction between alteplase with one of time, age or baseline NIHSS. Each is adjusted for treatment delay (linear), age (linear) and baseline NIHSS (quadratic), and interactions between alteplase with the other main effects (i.e. two of age, time and baseline NIHSS).

The estimated odds ratio is plotted for patients with AVERAGE levels of the other 2 baseline characteristics. The OR for alteplase was 1.22 at the mean values of age (71 years), NIHSS (12 points) and time to treatment (4 hours). The significance of each interaction is tested by comparing the change in deviance between two nested models that differ only by the interaction term(s) (ie, the likelihood ratio test).
